# Supplementary material for: Cardioprotective Effects of the GRK2 Inhibitor Paroxetine on Isoproterenol-Induced Cardiac Remodeling by Modulating NF-κB Mediated Prohypertrophic and Profibrotic Gene Expression
Source: MDPI journal article supplement (doi:10.3390/ijms242417270), 2023-12-08
Supplement: s1 [file s1]

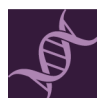

**Table S1.** Original data for the effects Paroxetine on ISO-induced cardiac injury, hypertrophic and fibrotic markers.

|                          |              | Control   | CH         | CH+P      | CH+F       |
|--------------------------|--------------|-----------|------------|-----------|------------|
| HW/BW Ratio<br>(mg/g)    | Repeat no. 1 | 3.76      | 4.71       | 4.91      | 4.67       |
|                          | Repeat no. 2 | 3.8       | 4.96       | 4.11      | 4.72       |
|                          | Repeat no. 3 | 3.85      | 4.79       | 3.86      | 4.62       |
|                          | Repeat no. 4 | 3.76      | 5.11       | 4.27      | 4.53       |
|                          | Repeat no. 5 | 3.52      | 4.89       | 4.16      | 4.46       |
|                          | Repeat no. 6 | 3.65      | 6.31       | 4.3       | 4.75       |
|                          |              | Control   | CH         | CH+P      | CH+F       |
| Troponin-I<br>(pg/ml)    | Repeat no. 1 | 46817.340 | 145334.000 | 16891.097 | 66966.850  |
|                          | Repeat no. 2 | 44158.000 | 145334.000 | 47480.090 | 120841.810 |
|                          | Repeat no. 3 | 41498.614 | 126624.976 | 91512.615 | 99757.000  |
|                          | Repeat no. 4 | 44158.000 | 164042.541 | 96295.485 | 75278.443  |
|                          | Repeat no. 5 | 00000000  | 00000000   | 10709.626 | 154642.000 |
|                          | Repeat no. 6 | 00000000  | 00000000   | 52578.000 | 81054.833  |
|                          |              | Control   | CH         | CH+P      | CH+F       |
| CK-MB<br>(ng/ml)         | Repeat no. 1 | 66.390    | 66.0461    | 65.1856   | 62.087     |
|                          | Repeat no. 2 | 4.8338    | 116.100    | 13.1689   | 10.565     |
|                          | Repeat no. 3 | 39.490    | 187.567    | 16.9854   | 69.280     |
|                          | Repeat no. 4 | 4.6601    | 155.749    | 18.5460   | 12.127     |
|                          | Repeat no. 5 | 29.026    | 90.262     | 28.421    | 103.619    |
|                          | Repeat no. 6 | 88.033    | 74.128     | 62.087    | 116.947    |
|                          |              | Control   | CH         | CH+P      | CH+F       |
| BNP<br>(ng/ml)           | Repeat no. 1 | 0.477     | 2.197      | 1.267     | 1.020      |
|                          | Repeat no. 2 | 0.625     | 2.121      | 0.032     | 2.384      |
|                          | Repeat no. 3 | 0.431     | 1.533      | 0.182     | 1.468      |
|                          | Repeat no. 4 | 0.965     | 1.655      | 1.155     | 1.171      |
|                          | Repeat no. 5 | 0.630     | 1.877      | 0.092     | 2.231      |
|                          |              | Control   | CH         | CH+P      | CH+F       |
| Hydroxyproline<br>(µg/g) | Repeat no. 1 | 4.997     | 6.1484     | 5.7140    | 5.9500     |
|                          | Repeat no. 2 | 4.856     | 6.3900     | 5.8662    | 6.0780     |
|                          | Repeat no. 3 | 5.620     | 6.2015     | 5.4790    | 6.5549     |
|                          | Repeat no. 4 | 5.336     | 6.0338     | 5.6846    | 6.4661     |
|                          | Repeat no. 5 | 00000     | 6.4533     | 00000     | 7.0350     |
|                          | Repeat no. 6 | 00000     | 6.3170     | 00000     | 6.1960     |

**Table S2.** Effect of paroxetine on NF-κB and inflammatory biomarkers.

|                                   |              | Control | CH     | CH+P   | CH+F    |
|-----------------------------------|--------------|---------|--------|--------|---------|
| NFκB (p105)<br>subunit<br>(ng/ml) | Repeat no. 1 | 10.95   | 13.47  | 10.49  | 12.05   |
|                                   | Repeat no. 2 | 9.68    | 12.84  | 9.90   | 11.63   |
|                                   | Repeat no. 3 | 12.78   | 13.36  | 9.58   | 14.27   |
|                                   | Repeat no. 4 | 12.32   | 12.76  | 10.66  | 13.99   |
|                                   | Repeat no. 5 | 10.96   | 13.11  | 12.65  | 12.54   |
|                                   | Repeat no. 6 | 10.87   | 0000   | 12.68  | 12.87   |
|                                   |              | Control | CH     | CH+P   | CH+F    |
| CRP<br>(pg/ml)                    | Repeat no. 1 | 29.127  | 58.718 | 35.185 | 58.7180 |
|                                   | Repeat no. 2 | 31.714  | 63.015 | 36.058 | 57.497  |

|                |              |         |         |         |         |
|----------------|--------------|---------|---------|---------|---------|
| IL6<br>(pg/ml) | Repeat no. 3 | 32.291  | 56.280  | 29.127  | 31.138  |
|                | Repeat no. 4 | 29.701  | 67.974  | 28.841  | 29.127  |
|                | Repeat no. 5 | 27.982  | 65.178  | 30.850  | 32.868  |
|                | Control      |         | CH      | CH+P    | CH+F    |
|                | Repeat no. 1 | 96.935  | 143.209 | 106.039 | 101.148 |
|                | Repeat no. 2 | 86.572  | 149.080 | 100.744 | 125.801 |
|                | Repeat no. 3 | 90.244  | 137.219 | 85.040  | 107.894 |
|                | Repeat no. 4 | 103.787 | 129.115 | 82.380  | 129.560 |

Table S3. Effect of paroxetine on pro-hypertrophic and pro-fibrotic gene expression.

|                           |              | Control | CH    | CH+P  | CH+F  |
|---------------------------|--------------|---------|-------|-------|-------|
| GRK2 Gene Expression      | Repeat no. 1 | 0.973   | 1.152 | 0.893 | 1.094 |
|                           | Repeat no. 2 | 0.927   | 1.014 | 0.692 | 1.229 |
|                           | Repeat no. 3 | 0.938   | 1.161 | 0.791 | 1.264 |
|                           | Repeat no. 4 | 0.916   | 0000  | 0000  | 0000  |
|                           |              | Control | CH    | CH+P  | CH+F  |
| NFκB(p65) Gene Expression | Repeat no. 1 | 1.049   | 1.118 | 1.219 | 1.556 |
|                           | Repeat no. 2 | 0.795   | 1.166 | 1.263 | 1.584 |
|                           | Repeat no. 3 | 0.710   | 1.316 | 1.123 | 1.775 |
|                           | Repeat no. 4 | 0000    | 0000  | 1.279 | 00000 |
|                           |              | Control | CH    | CH+P  | CH+F  |
| IκB-α Gene Expression     | Repeat no. 1 | 0.859   | 0.779 | 0.911 | 1.151 |
|                           | Repeat no. 2 | 1.150   | 0.731 | 0.723 | 1.057 |
|                           | Repeat no. 3 | 1.012   | 0.806 | 0.845 | 0.933 |
|                           | Repeat no. 4 | 1.058   | 00000 | 00000 | 1.079 |
|                           |              | Control | CH    | CH+P  | CH+F  |
| TGFβ-1 Gene Expression    | Repeat no. 1 | 0.796   | 1.096 | 0.883 | 1.541 |
|                           | Repeat no. 2 | 0.905   | 1.044 | 0.927 | 1.369 |
|                           | Repeat no. 3 | 1.045   | 1.213 | 0.878 | 1.433 |
|                           | Repeat no. 4 | 0000    | 0000  | 0.897 | 0000  |
|                           |              | Control | CH    | CH+P  | CH+F  |
| ANP Gene Expression       | Repeat no. 1 | 0.865   | 3.106 | 2.470 | 3.659 |
|                           | Repeat no. 2 | 1.036   | 3.229 | 2.434 | 3.717 |
|                           | Repeat no. 3 | 1.116   | 3.147 | 2.366 | 3.367 |
|                           | Repeat no. 4 | 0000    | 0000  | 0000  | 0000  |
|                           |              | Control | CH    | CH+P  | CH+F  |
| α-SMA Gene Expression     | Repeat no. 1 | 0.938   | 1.062 | 0.640 | 0.884 |
|                           | Repeat no. 2 | 0.953   | 1.145 | 0.800 | 1.056 |
|                           | Repeat no. 3 | 1.003   | 0.965 | 0.551 | 1.133 |
|                           | Repeat no. 4 | 0000    | 0000  | 0.464 | 0000  |
|                           |              | Control | CH    | CH+P  | CH+F  |
| Smad3 Gene Expression     | Repeat no. 1 | 1.031   | 1.161 | 0.815 | 1.471 |
|                           | Repeat no. 2 | 0.882   | 1.080 | 0.601 | 1.741 |
|                           | Repeat no. 3 | 0.956   | 1.120 | 0.708 | 1.606 |
|                           | Repeat no. 4 | 0000    | 0000  | 0000  | 0000  |
